# Supplementary material for: TAM-derived extracellular vesicles containing microRNA-29a-3p explain the deterioration of ovarian cancer
Source: PubMed Central journal article supplement (PMC8463289; doi:10.1016/j.omtn.2021.05.011), 2021-05-19
Supplement: mmc1.pdf [file mmc1.pdf]

**OMTN, Volume 25**

**Supplemental information**

**TAM-derived extracellular vesicles containing  
microRNA-29a-3p explain the deterioration  
of ovarian cancer**

**Lili Lu, Wanwen Ling, and Zhengyi Ruan**

1 **Supplementary table 1** Clinicopathological information of OC patients

| <b>Clinicopathological information</b> |                            | <b>n</b> |
|----------------------------------------|----------------------------|----------|
| Age                                    | ≥55                        | 35       |
|                                        | < 55                       | 40       |
| Histological type                      | Epithelial OC              | 37       |
|                                        | Serous OC                  | 22       |
|                                        | Mucous OC                  | 11       |
|                                        | Undifferentiated carcinoma | 5        |
| FIGO staging                           | I                          | 10       |
|                                        | II                         | 14       |
|                                        | III                        | 43       |
|                                        | IV                         | 8        |

2
